# Supplementary material for: RNAi-Mediated Silencing of the Chitinase 5 Gene for Fall Webworm (Hyphantria cunea) Can Inhibit Larval Molting Depending on the Timing of dsRNA Injection
Source: MDPI journal article supplement (doi:10.3390/insects12050406), 2021-04-30

**Table S1.** Primer sequences used in this study

**Primers used for HcCht5 cloning**

| Primer name | Primer sequence (5'-3') |
|-------------|-------------------------|
| HcCht5-F    | ATGCGAGTCTTACTAGCGTCGTT |
| HcCht5-R    | CTATTCCTGCAGTTATTGCGAT  |

**Primers used for dsRNA synthesis**

| Primer name  | Primer sequence (5'-3')                 |
|--------------|-----------------------------------------|
| dsGFP--T7F   | taatacgactcactatagggTGAGCAAGGGCGAGGAG   |
| dsGFP--T7R   | taatacgactcactatagggCGGCGGTCACGAACTCCAG |
| dsHcCht5-T7F | taatacgactcactatagggCACGCATCTCATCTACTCA |
| dsHcCht5-T7R | taatacgactcactatagggCGAACCTTTACCGACCCT  |

**Primers used for RT-qPCR detection of HcCht5**

| Primer name | Primer sequence (5'-3') |
|-------------|-------------------------|
| HcActin-qF  | GGTACTCTTTACCAACACAG    |
| HcActin-qR  | GGACTTCTCAAGGGAAGTGC    |
| HcCht5-qF   | TCGGTCGTTCACTTTAGCAG    |
| HcCht5-qR   | TTTGTAAGCGTAGGGGCAT     |

**Primers used for RT-qPCR validation of selected DEGs**

| Primer name | Primer sequence (5'-3') | Gene ID         |
|-------------|-------------------------|-----------------|
| BG1-qF      | AGCAATGACTTCAAGCCTACA   | c46905.graph_c0 |
| BG1-qR      | AACCCTGTCTCCTGACTTCG    |                 |
| JHE-qF      | CGGTTTAACAACATTTGTCCC   | c40455.graph_c0 |
| JHE-qR      | AAGGTTTCGCACTCAGCATT    |                 |
| EcK-qF      | AGTAGCTGATTCGATCTTGGTC  | c39726.graph_c0 |
| EcK-qR      | TTTCCTTGTTTCGTAGTCCGT   |                 |
| CPA2-qF     | GGAACATCGGGTCTCGTCTT    | c47956.graph_c0 |
| CPA2-qR     | GCCTGGTTACTCTGGGGAAT    |                 |
| ODE1-qF     | CGTCAGCCAGACCCAAGATG    | c43328.graph_c1 |
| ODE1-qR     | GCCCGACAGGTAGAAGGACA    |                 |

|           |                         |                 |
|-----------|-------------------------|-----------------|
| ODE2-qF   | GCAGCTCTTAGATGGGTGAA    | c47555.graph_c3 |
| ODE2-qR   | TCTGGGTAATGGCTCTTTTG    |                 |
| UGT1-qF   | ATCCAGCTTTGTCACCACATG   | c45767.graph_c0 |
| UGT1-qR   | CGGTCCCCTTGGAACTTTTTC   |                 |
| UGT2-qF   | CAATCAACAGACGAAGCTATCAC | c47118.graph_c0 |
| UGT2-qR   | CTAAATCAAGCCGGACTCCAA   |                 |
| CYP450-qF | TAATAACGAGCCAGGAAACAG   | c47822.graph_c2 |
| CYP450-qR | TTCGTCAAGTAGTGGGGTGTA   |                 |
| CaE-qF    | AAATATGGAAACCCAACCCC    | c47555.graph_c2 |
| CaE-qR    | GATGGCATCCCAAACTTGAT    |                 |

**Table S2.** GenBank accession numbers for the phylogenetic tree used in this study.

| <b>Species</b>                 | <b>Gene name</b> | <b>GenBank accession no.</b> |
|--------------------------------|------------------|------------------------------|
| <i>Acromyrmex echinator</i>    | AeCHT3           | EGI59292                     |
| <i>Ancylostoma ceylanicum</i>  | AcCHT7           | EYC03522                     |
| <i>Anopheles gambiae</i>       | AgCht1           | XP_317335.2                  |
|                                | AgCht2           | XP_315650.4                  |
|                                | AgCht4           | XP_315351.4                  |
|                                | AgCht7           | XP_308858.4                  |
|                                | AgCht10          | XP_001238192.2               |
|                                | AgCht11          | XP_310662.5                  |
|                                | AgCht13          | XP_314312.4                  |
|                                | AgCht16          | XP_319801.4                  |
|                                | AgCht23          | XP_001688641.1               |
|                                | AgCht24          | XP_316256.4                  |
|                                | AgIDGF2          | XP_001237925.1               |
|                                | AgIDGF4          | XP_317398.3                  |
|                                | AgCHT5-1         | HQ456129                     |
|                                | AgCHT5-2         | HQ456130                     |
|                                | AgCHT5-3         | HQ456131                     |
|                                | AgCHT5-4         | HQ456132                     |
|                                | AgCHT5-5         | HQ456133                     |
| <i>Bombyx mori</i>             | <i>BmCht1</i>    | XP_004931749.1               |
|                                | BmCht2           | XP_004933352.1               |
|                                | BmCht3           | XP_012551241.1               |
|                                | BmCht5           | AAB47538.1                   |
|                                | BmCht6           | XP_012553393.1               |
|                                | BmCht7           | XP_004922005.1               |
|                                | BmCht11          | XP_004926923.1               |
|                                | BmCht-h          | BAC67246.1                   |
| <i>Daphnia pulex</i>           | DpCHT5           | DpCHT5                       |
|                                | DpCHT6           | DpCHT6                       |
| <i>Drosophila melanogaster</i> | DmCht1           | NP_609190.2                  |
|                                | DmCht2           | NP_477298.2                  |
|                                | DmCht5           | NP_650314.1                  |
|                                | DmCht6           | NP_572598.3                  |
|                                | DmCht7           | NP_647768.3                  |
|                                | DmCht10          | EAA46011.1                   |

|                            |         |                |
|----------------------------|---------|----------------|
|                            | DmCht11 | NP_572361.1    |
| <i>Locusta migratoria</i>  | LmCht10 | AMT75074.1     |
| <i>Ostrinia furnacalis</i> | OfCht-h | BAE16587.1     |
| <i>Tribolium castaneum</i> | TcCht1  | XP_971647.1    |
|                            | TcCht2  | XP_970191.2    |
|                            | TcCht3  | XP_008197064.1 |
|                            | TcCht5  | NP_001034524.1 |
|                            | TcCht7  | NP_001036035.1 |
|                            | TcCht10 | NP_001036067.1 |
|                            | TcIDGF4 | NP_001038091   |
|                            | TcIDGF2 | NP_001038092.1 |

**Table S3.** Expression stability values of the reference genes for different developmental stages and different tissues.

| Different developmental stages |                 |      | Different tissues |                 |      |
|--------------------------------|-----------------|------|-------------------|-----------------|------|
| Gene                           | Stability value | Rank | Gene              | Stability value | Rank |
| <i>β-actin</i>                 | 0.597           | 1    | <i>β-actin</i>    | 0.720           | 1    |
| <i>β-tubulin</i>               | 0.651           | 2    | <i>β-tubulin</i>  | 0.733           | 2    |
| <i>GAPDH</i>                   | 0.750           | 3    | <i>GAPDH</i>      | 1.274           | 3    |
| <i>EF1α</i>                    | 1.160           | 4    | <i>EF1α</i>       | 1.345           | 4    |

**Table S4.** Summary of the RNA-sequencing data..

| <b>Samples</b>    | <b>Clean reads</b> | <b>Clean bases</b> | <b>Q20 (%)</b> | <b>Q30 (%)</b> | <b>GC (%)</b> |
|-------------------|--------------------|--------------------|----------------|----------------|---------------|
| <i>dsHcCht5-1</i> | 26,222,045         | 7.8G               | 97.73          | 94.51          | 45.71         |
| <i>dsHcCht5-2</i> | 28,097,827         | 8.4G               | 97.73          | 94.52          | 45.47         |
| <i>dsHcCht5-3</i> | 25,301,548         | 7.6G               | 97.71          | 94.49          | 45.36         |
| <i>dsGFP-1</i>    | 26,224,702         | 7.8G               | 97.72          | 94.50          | 45.38         |
| <i>dsGFP-2</i>    | 24,600,974         | 7.4G               | 97.60          | 94.27          | 46.38         |
| <i>dsGFP-3</i>    | 24,480,876         | 7.3G               | 97.70          | 94.45          | 45.81         |

**Figure S1.** Phylogenetic tree of chitinases from different insect species. The tree was generated using MEGA 6.0 software with neighbor joining method. Bootstrap analyses of 1000 replicates were performed, and the bootstrap values are represented in cladograms. Chits are grouped into 11 different groups. Cht of *H. cunea* (HcCht5) is marked with a red square. The GenBank accession numbers of these chitinases are listed in Table S2.

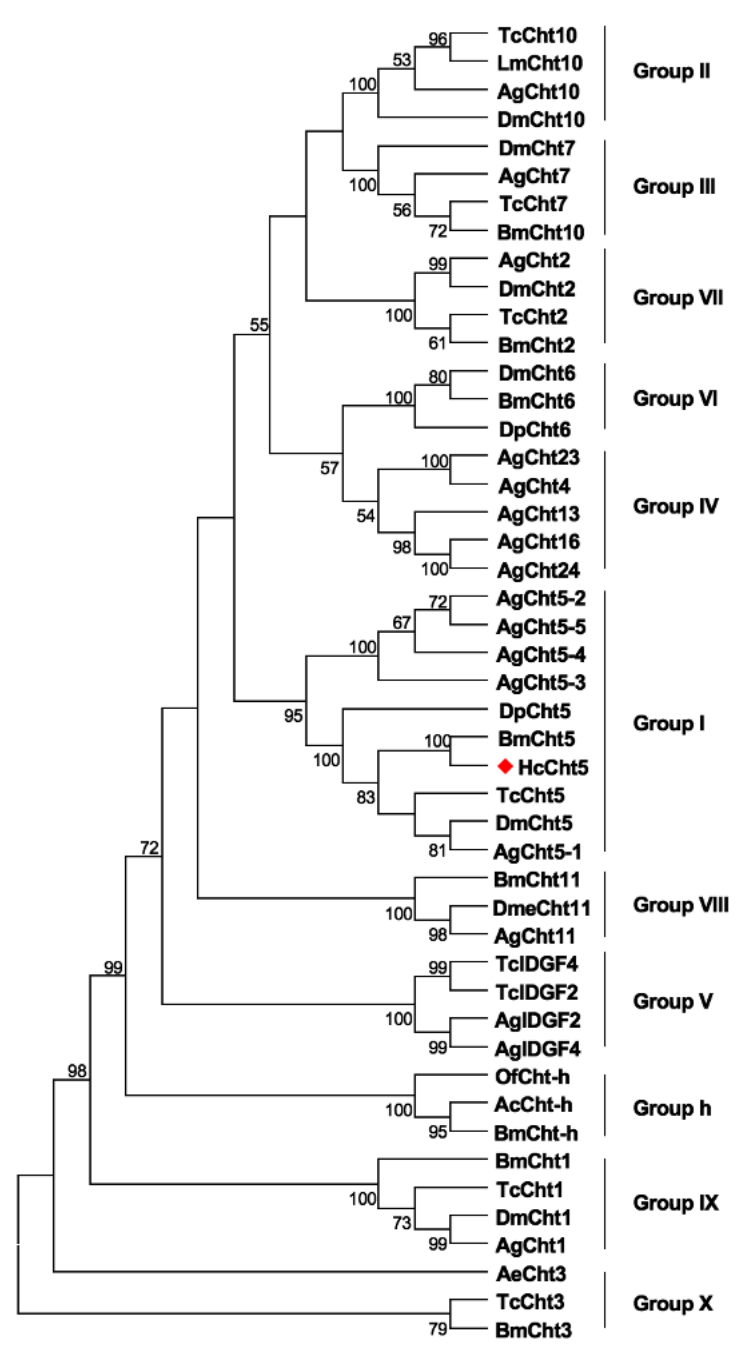

**Figure S2.** Correlation analysis of RNA-seq samples. Pearson's correlation coefficient was used as the evaluation index of inter-sample correlations.  $r^2 > 0.8$  represents a strong correlation of all the samples.

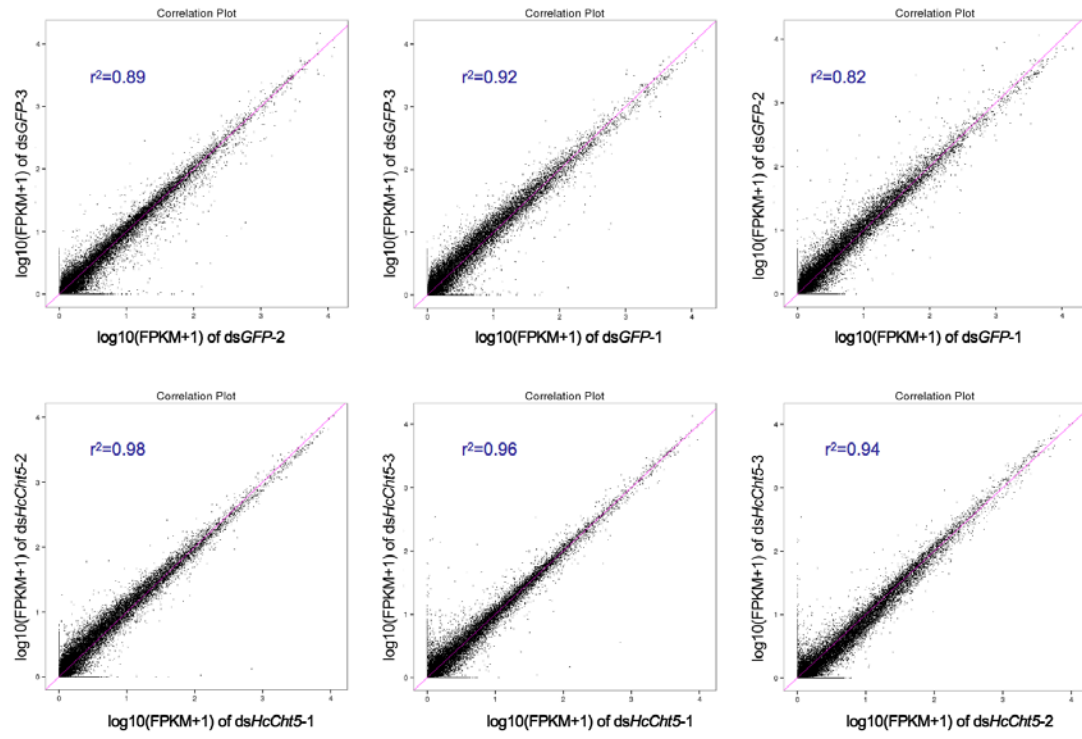



**Figure S3.** RT-qPCR validation of 10 selected RNA-seq-based DGEs. The letters indicate putative gene names in *H. cunea*.

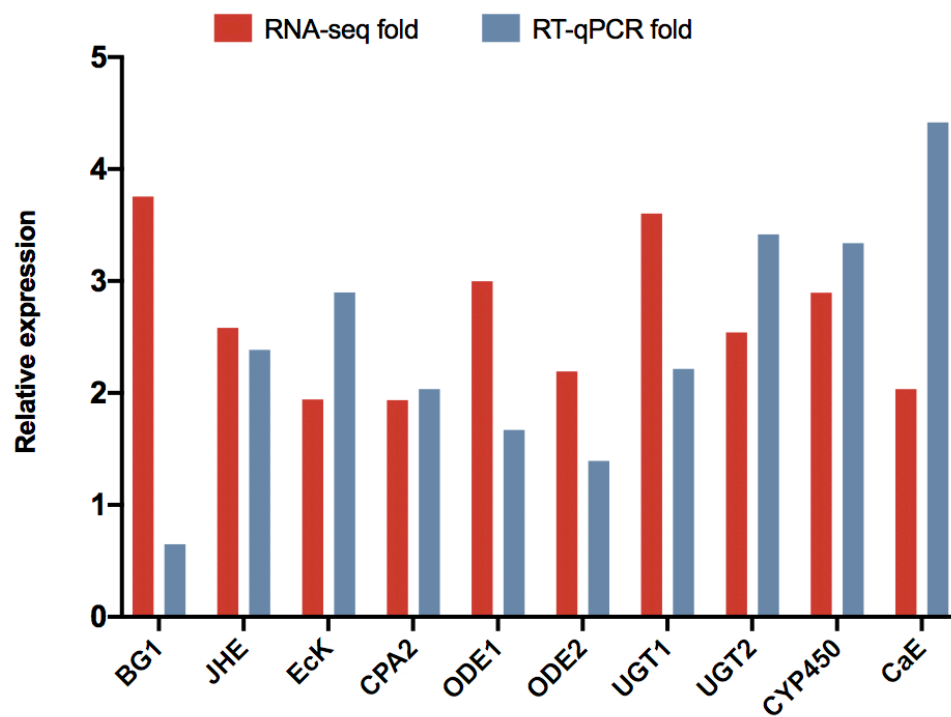

**Figure S4.** The expression levels of the differentially expressed immunity genes in the untreated group, dsGFP-treated group, and dsHcCht5-treated group (\*,  $P < 0.05$ ; and \*\*,  $P < 0.01$ ).

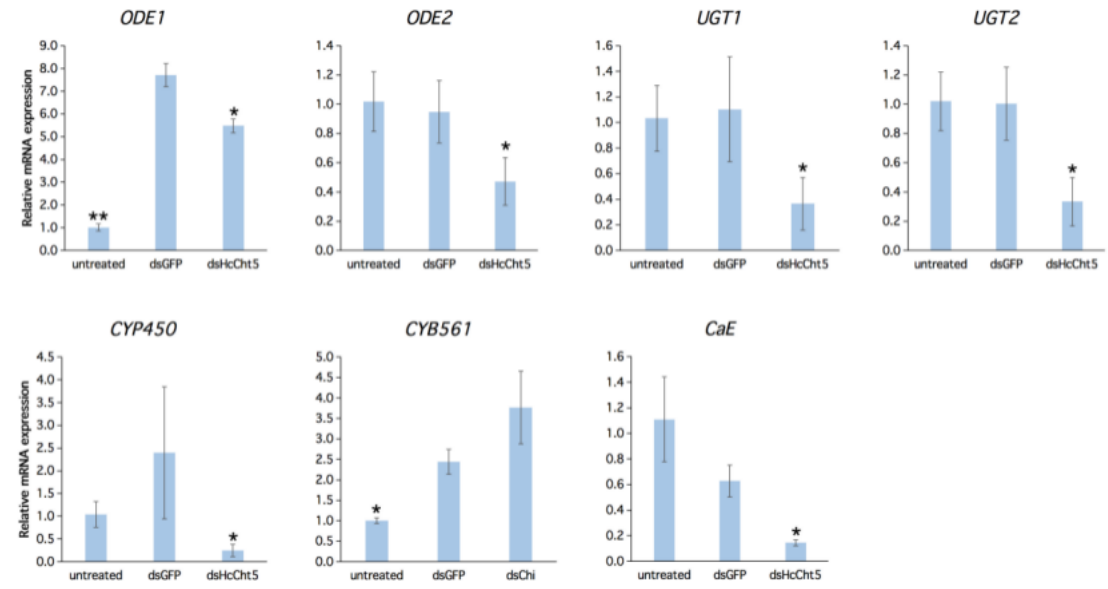

Supplement: s1 [file s1]
